# Supplementary material
Source: publisher site journal article supplement (https://www.dovepress.com/get_supplementary_file.php?f=353879.docx)
Supplement: Supplementary file 1 [file get_supplementary_file.php]

**Comprehensive Characterization of Transforming Growth Factor Beta Receptor 1 in** **Stomach Adenocarcinoma Identifies a Prognostic Signature for Predicting Clinical Outcomes and Immune Infiltrates**

Yi He1#, Yan Zhang1,2#, Haiyang Zhang1#, Peiyun Wang1, Kegan Zhu1, Yi Ba*1

Tianjin Medical University Cancer Institute and Hospital, National Clinical Research Center for Cancer, Tianjin’s Clinical Research Center for Cancer, Key Laboratory of Cancer Prevention and Therapy, Tianjin, 300060, China.

2Department of Gastroenterology, Tianjin Haihe Hospital, Tianjin, 300350, China.

#These authors contributed equally to this work.

*Correspondence: Yi Ba (Email: [bayi@tjmuch.com](mailto:bayi@tjmuch.com)).

**Contents**

**Results**

1. Table S1: Correlation Between TGFBR1 Expression and Clinicopathologic Characteristics of Patients with STAD

2. Table S2. top 100 TGFBR1-correlated genes in GEPIA2 datasets

3. Table S3. 20 TGFBR1-related genes

4. Table S4: Associations with Clinicopathologic Characteristics in STAD Patients Using Cox Regression

5. Table S5 Correlation analysis between TGFBR1 and markers of immune cells in TIMER2

6. Table S6. Abbreviations and their meanings in the paper

7. Fig S1: High TGFBR1 Expression is Correlated with Clinicopathologic Features in Patients with STAD.

8. Fig S2. LASSO regression analysis of the 20 DEGs and TGFBR1.

9. Fig S3: A. the enrichment scores of TGFBR1 expression in 24 immune cells.

10. FigS4: A-I. Correlation analysis between TGFBR1 expression and immune checkpoint in STAD based on GEPIA2.

Table S1: Correlation Between TGFBR1 Expression and Clinicopathologic Characteristics of Patients with STAD

| Characteristic | Low expression of TGFBR1 | High expression of TGFBR1 | p |
| --- | --- | --- | --- |
| n | 187 | 188 |  |
| T stage, n (%) |  |  | 0.001 |
| T1 | 15 (4.1%) | 4 (1.1%) |  |
| T2 | 49 (13.4%) | 31 (8.4%) |  |
| T3 | 84 (22.9%) | 84 (22.9%) |  |
| T4 | 38 (10.4%) | 62 (16.9%) |  |
| N stage, n (%) |  |  | 0.004 |
| N0 | 69 (19.3%) | 42 (11.8%) |  |
| N1 | 53 (14.8%) | 44 (12.3%) |  |
| N2 | 32 (9%) | 43 (12%) |  |
| N3 | 28 (7.8%) | 46 (12.9%) |  |
| M stage, n (%) |  |  | 0.965 |
| M0 | 167 (47%) | 163 (45.9%) |  |
| M1 | 12 (3.4%) | 13 (3.7%) |  |
| Gender, n (%) |  |  | 0.617 |
| Female | 64 (17.1%) | 70 (18.7%) |  |
| Male | 123 (32.8%) | 118 (31.5%) |  |
| Age, n (%) |  |  | 0.880 |
| <=65 | 81 (21.8%) | 83 (22.4%) |  |
| >65 | 105 (28.3%) | 102 (27.5%) |  |
| Histological type, n (%) |  |  | 0.249 |
| Diffuse Type | 27 (7.2%) | 36 (9.6%) |  |
| Mucinous Type | 6 (1.6%) | 13 (3.5%) |  |
| Not Otherwise Specified | 113 (30.2%) | 94 (25.1%) |  |
| Papillary Type | 3 (0.8%) | 2 (0.5%) |  |
| Signet Ring Type | 4 (1.1%) | 7 (1.9%) |  |
| Tubular Type | 34 (9.1%) | 35 (9.4%) |  |
| Histologic grade, n (%) |  |  | 0.291 |
| G1 | 6 (1.6%) | 4 (1.1%) |  |
| G2 | 75 (20.5%) | 62 (16.9%) |  |
| G3 | 103 (28.1%) | 116 (31.7%) |  |
| Pathologic stage, n (%) |  |  | < 0.001 |
| Stage I | 37 (10.5%) | 16 (4.5%) |  |
| Stage II | 64 (18.2%) | 47 (13.4%) |  |
| Stage III | 60 (17%) | 90 (25.6%) |  |
| Stage IV | 17 (4.8%) | 21 (6%) |  |
| Primary therapy outcome, n (%) |  |  | 0.187 |
| PD | 35 (11%) | 30 (9.5%) |  |
| SD | 7 (2.2%) | 10 (3.2%) |  |
| PR | 0 (0%) | 4 (1.3%) |  |
| CR | 117 (36.9%) | 114 (36%) |  |
| Barretts esophagus, n (%) |  |  | 1.000 |
| No | 107 (51.4%) | 86 (41.3%) |  |
| Yes | 8 (3.8%) | 7 (3.4%) |  |
| Age, mean ± SD | 66.2 ± 10.57 | 65.46 ± 10.74 | 0.504 |

Table S2. top 100 TGFBR1-correlated genes in GEPIA2 datasets

| Gene Symbol | Gene ID | PCC |
| --- | --- | --- |
| KCTD10 | ENSG00000110906.12 | 0.75 |
| CLIC4 | ENSG00000169504.14 | 0.73 |
| PARVA | ENSG00000197702.11 | 0.71 |
| ZYG11B | ENSG00000162378.12 | 0.71 |
| TMEM245 | ENSG00000106771.12 | 0.71 |
| TEAD1 | ENSG00000187079.14 | 0.70 |
| PKD2 | ENSG00000118762.7 | 0.69 |
| GJC1 | ENSG00000182963.9 | 0.69 |
| ITGA9 | ENSG00000144668.11 | 0.69 |
| MAP1B | ENSG00000131711.14 | 0.69 |
| RNF180 | ENSG00000164197.11 | 0.69 |
| DDR2 | ENSG00000162733.16 | 0.68 |
| RBFOX2 | ENSG00000100320.22 | 0.68 |
| SAMD4A | ENSG00000020577.13 | 0.68 |
| ZEB1 | ENSG00000148516.21 | 0.68 |
| ITGA1 | ENSG00000213949.8 | 0.68 |
| DYNC1LI2 | ENSG00000135720.12 | 0.68 |
| FAM172A | ENSG00000113391.16 | 0.68 |
| PRICKLE2 | ENSG00000163637.11 | 0.67 |
| FYCO1 | ENSG00000163820.14 | 0.67 |
| MEF2A | ENSG00000068305.17 | 0.67 |
| AKT3 | ENSG00000117020.16 | 0.67 |
| PDE8B | ENSG00000113231.13 | 0.67 |
| RHOQ | ENSG00000119729.10 | 0.66 |
| ZBTB47 | ENSG00000114853.13 | 0.66 |
| SDC3 | ENSG00000162512.15 | 0.66 |
| FERMT2 | ENSG00000073712.13 | 0.66 |
| LAMA4 | ENSG00000112769.18 | 0.66 |
| DIP2C | ENSG00000151240.15 | 0.66 |
| MID2 | ENSG00000080561.13 | 0.66 |
| ARSB | ENSG00000113273.15 | 0.66 |
| LTBP1 | ENSG00000049323.15 | 0.66 |
| FOXN3 | ENSG00000053254.15 | 0.66 |
| TNS1 | ENSG00000079308.16 | 0.66 |
| MRVI1 | ENSG00000072952.18 | 0.66 |
| BMPR1A | ENSG00000107779.11 | 0.65 |
| MAP4 | ENSG00000047849.21 | 0.65 |
| MCAM | ENSG00000076706.14 | 0.65 |
| JAM3 | ENSG00000166086.12 | 0.65 |
| SEC23A | ENSG00000100934.14 | 0.65 |
| ABCC9 | ENSG00000069431.10 | 0.65 |
| PALLD | ENSG00000129116.17 | 0.65 |
| LPP | ENSG00000145012.12 | 0.65 |
| ZNF25 | ENSG00000175395.15 | 0.65 |
| MSRB3 | ENSG00000174099.10 | 0.65 |
| NRXN3 | ENSG00000021645.17 | 0.64 |
| LAYN | ENSG00000204381.11 | 0.64 |
| RABGAP1 | ENSG00000011454.16 | 0.64 |
| C14orf132 | ENSG00000227051.5 | 0.64 |
| SPIN1 | ENSG00000106723.16 | 0.64 |
| PDE4D | ENSG00000113448.16 | 0.64 |
| STON1-GTF2A1L | ENSG00000068781.20 | 0.64 |
| ADARB1 | ENSG00000197381.15 | 0.64 |
| ST6GALNAC5 | ENSG00000117069.14 | 0.64 |
| STON1 | ENSG00000243244.5 | 0.64 |
| ABL1 | ENSG00000097007.17 | 0.64 |
| PJA2 | ENSG00000198961.9 | 0.64 |
| DUSP3 | ENSG00000108861.8 | 0.64 |
| RNF38 | ENSG00000137075.17 | 0.64 |
| FOXF1 | ENSG00000103241.6 | 0.63 |
| RBSN | ENSG00000131381.12 | 0.63 |
| SORBS1 | ENSG00000095637.20 | 0.63 |
| MBNL1 | ENSG00000152601.17 | 0.63 |
| NACC2 | ENSG00000148411.7 | 0.63 |
| CNTNAP1 | ENSG00000108797.11 | 0.63 |
| PBX3 | ENSG00000167081.16 | 0.63 |
| GNB4 | ENSG00000114450.9 | 0.63 |
| KATNAL1 | ENSG00000102781.13 | 0.63 |
| DLC1 | ENSG00000164741.14 | 0.63 |
| DCLK2 | ENSG00000170390.14 | 0.63 |
| DIXDC1 | ENSG00000150764.13 | 0.63 |
| PARK2 | ENSG00000185345.18 | 0.63 |
| ZBTB4 | ENSG00000174282.11 | 0.63 |
| MPDZ | ENSG00000107186.16 | 0.63 |
| RAI14 | ENSG00000039560.13 | 0.63 |
| FAM160B1 | ENSG00000151553.14 | 0.63 |
| KLF9 | ENSG00000119138.4 | 0.63 |
| KANK2 | ENSG00000197256.10 | 0.63 |
| TOR1AIP1 | ENSG00000143337.18 | 0.63 |
| CPXM2 | ENSG00000121898.12 | 0.63 |
| AKAP2 | ENSG00000241978.9 | 0.63 |
| AKAP6 | ENSG00000151320.10 | 0.63 |
| JMY | ENSG00000152409.8 | 0.62 |
| SLMAP | ENSG00000163681.14 | 0.62 |
| RP11-92C4.6 | ENSG00000270412.1 | 0.62 |
| CPED1 | ENSG00000106034.17 | 0.62 |
| DENND5A | ENSG00000184014.7 | 0.62 |
| SVIL | ENSG00000197321.14 | 0.62 |
| NEK9 | ENSG00000119638.12 | 0.62 |
| CIPC | ENSG00000198894.7 | 0.62 |
| BHMT2 | ENSG00000132840.9 | 0.62 |
| EOGT | ENSG00000163378.13 | 0.62 |
| EML1 | ENSG00000066629.16 | 0.62 |
| SYNC | ENSG00000162520.14 | 0.62 |
| LRCH2 | ENSG00000130224.14 | 0.62 |
| FAM168B | ENSG00000152102.17 | 0.62 |
| TTLL11 | ENSG00000175764.14 | 0.62 |
| CORO1C | ENSG00000110880.10 | 0.62 |
| STAT5B | ENSG00000173757.9 | 0.62 |
| FAM13B | ENSG00000031003.10 | 0.62 |

Table S3. 20 TGFBR1-related genes

| Gene symbol | logFC | p value | padj |
| --- | --- | --- | --- |
| SVIL | 1.500906 | 5.58E-34 | 2.13E-31 |
| MPDZ | 1.502302 | 5.27E-42 | 5.54E-39 |
| DIXDC1 | 1.56414 | 3.69E-44 | 5.36E-41 |
| STON1-GTF2A1L | 1.591767 | 4.1E-19 | 3.12E-17 |
| MAP1B | 1.623593 | 3.95E-40 | 3.25E-37 |
| FERMT2 | 1.633326 | 3.1E-48 | 9E-45 |
| DDR2 | 1.64635 | 1.22E-42 | 1.47E-39 |
| BHMT2 | 1.661764 | 9.4E-32 | 2.7E-29 |
| C14orf132 | 1.682967 | 5.17E-34 | 2.01E-31 |
| PRICKLE2 | 1.701713 | 5.96E-43 | 7.54E-40 |
| ABCC9 | 1.788529 | 1.7E-39 | 1.2E-36 |
| STON1 | 1.872576 | 4.48E-51 | 2.77E-47 |
| CPED1 | 1.87492 | 1.54E-39 | 1.13E-36 |
| TNS1 | 1.882241 | 1.36E-40 | 1.2E-37 |
| MSRB3 | 1.934397 | 2.91E-47 | 6.53E-44 |
| CPXM2 | 1.939792 | 3.7E-34 | 1.46E-31 |
| AKAP6 | 2.035696 | 1.58E-38 | 1.04E-35 |
| SYNC | 2.035883 | 2.16E-40 | 1.84E-37 |
| SORBS1 | 2.184733 | 7.34E-44 | 1.04E-40 |
| NRXN3 | 2.373459 | 1.13E-40 | 1.02E-37 |

Table S4: Associations with Clinicopathologic Characteristics in STAD Patients Using Cox Regression

| Characteristics | HR (95% CI) | P value |
| --- | --- | --- |
| Univariate analysis |  |  |
| T3&T4 vs (T1&T2) | 1.719 (1.131-2.612) | 0.011 |
| N stage (N1&N2&N3 vs N0) | 1.925 (1.264-2.931) | 0.002 |
| M stage (M1 vs M0) | 2.254 (1.295-3.924) | 0.004 |
| TGFBR1(High vs Low) | 1.645 (1.179-2.295) | 0.003 |
| Age (>65 vs <=65) | 1.620 (1.154-2.276) | 0.005 |
| Gender (Male vs Female) | 1.267 (0.891-1.804) | 0.188 |
| Histologic grade G3 vs(G1&G2) | 1.353 (0.957-1.914) | 0.087 |
| Primary therapy outcome (SD&PR&CR vs PD) | 0.241 (0.165-0.352) | <0.001 |
| multivariate analysis |  |  |
| T3&T4 vs (T1&T2) | 1.492 (0.853-2.607) | 0.161 |
| N stage (N1&N2&N3 vs N0) | 1.287 (0.774-2.137) | 0.331 |
| M stage (M1 vs M0) | 1.765 (0.830-3.755) | 0.140 |
| TGFBR1(High vs Low) | 1.733 (1.165-2.578) | 0.007 |
| Age (>65 vs <=65) | 1.923 (1.281-2.886) | 0.002 |
| Histologic grade G3 vs(G1&G2) | 1.717 (1.124-2.623) | 0.012 |
| Primary therapy outcome (SD&PR&CR vs PD) | 0.227 (0.151-0.341) | <0.001 |

Table S5 Correlation analysis between TGFBR1 and markers of immune cells in TIMER2

| Description | Gene markers | STAD | | | |
| --- | --- | --- | --- | --- | --- |
| None | | Purity | |
| cor | p | cor | p |
| CD8+T cell | CD8A | 0.193176 | 7.47E-05 | 0.191376 | *** |
| CD8B | 0.116758 | * | 0.122913 | * |
| B cell | CD19 | 0.145225 | ** | 0.143698 | * |
| CD79A | 0.080533 | 0.101359 | 0.069968 | 0.174053 |
| T cell (general) | CD2 | 0.166071 | ** | 0.177884 | ** |
| CD3D | 0.082814 | 0.092015 | 0.089776 | 0.080897 |
| CD3E | 0.103589 | * | 0.11805 | * |
| Dendritic cell | CD1C | 0.248421 | *** | 0.266934 | *** |
| HLA-DPA1 | 0.086889 | 0.07705 | 0.087213 | 0.089986 |
| HLA-DPB1 | 0.089836 | 0.067509 | 0.087484 | 0.088985 |
| HLA-DQB1 | 0.002143 | 0.965286 | 0.003934 | 0.939146 |
| HLA-DRA | 0.058686 | 0.232889 | 0.06168 | 0.230935 |
| ITGAX(CD11C) | 0.349478 | *** | 0.351671 | *** |
| NRP1 | 0.522294 | *** | 0.52699 | *** |
| Monocyte | CD86 | 0.271163 | *** | 0.284061 | *** |
| CSF1R(CD115) | 0.422028 | *** | 0.417374 | *** |
| M1  Macrophage | IRF5 | 0.191952 | 8.31E-05 | 0.202119 | 7.41E-05 |
| NOS2 | -0.00307 | 0.95033 | -0.00253 | 0.960839 |
| PTGS2 | 0.25425 | *** | 0.262486 | *** |
| M2  Macrophage | CD163 | 0.43154 | *** | 0.437968 | *** |
| MS4A4A | 0.362993 | *** | 0.370423 | *** |
| VSIG4 | 0.361185 | *** | 0.373065 | *** |
| TAM | CCL2 | 0.299029 | *** | 0.305362 | *** |
| CD68 | 0.151294 | *** | 0.152384 | ** |
| IL10 | 0.287491 | *** | 0.301947 | *** |
| NK cell | KIR2DL1 | 0.180803 | *** | 0.183648 | *** |
| KIR2DL3 | 0.108487 | * | 0.087666 | 0.088323 |
| KIR2DL4 | -0.02344 | 0.634017 | -0.03423 | 0.506391 |
| KIR2DS4 | 0.112557 | * | 0.102084 | * |
| KIR3DL1 | 0.151271 | ** | 0.128413 | * |
| KIR3DL2 | 0.123974 | * | 0.11811 | * |
| KIR3DL3 | 0.0133 | 0.787051 | 0.008714 | 0.865734 |
| Neutrophils | CCR7 | 0.232123 | *** | 0.248176 | *** |
| CEACAM8 | 0.091303 | 0.063132 | 0.098906 | 0.054373 |
| ITGAM | 0.351498 | *** | 0.363363 | *** |
| Th2 | GATA3 | 0.198144 | * | 0.205701 | 5.47E-05 |
| IL13 | 0.060757 | 0.216783 | 0.076006 | 0.139697 |
| STAT5A | 0.381184 | *** | 0.389848 | *** |
| STAT6 | 0.261588 | *** | 0.265655 | *** |
| Th1 | IFNG | 0.001592 | 0.974204 | 0.004794 | 0.925889 |
| STAT1 | 0.173163 | *** | 0.1644 | ** |
| STAT4 | 0.329852 | *** | 0.341129 | *** |
| TBX21 | 0.149525 | ** | 0.159203 | ** |
| TNF | -0.0072 | 0.883787 | -0.00297 | 0.954111 |
| Tfh | BCL6 | 0.486884 | *** | 0.482278 | *** |
| IL21 | 0.043422 | 0.377607 | 0.045623 | 0.375771 |
| Th17 | IL17A | -0.1392 | *** | -0.12542 | * |
| STAT3 | 0.552904 | *** | 0.546375 | *** |
| Treg | CCR8 | 0.300346 | *** | 0.298788 | *** |
| FOXP3 | 0.175633 | *** | 0.172984 | ** |
| STAT5B | 0.587878 | *** | 0.584431 | *** |
| TGFB1 | 0.37103 | *** | 0.357758 | *** |
| T cell exhaustion | CTLA4 | 0.15921 | ** | 0.168492 | ** |
| GZMB | -0.01039 | 0.832891 | -0.03254 | 0.527684 |
| HAVCR2 | 0.302736 | *** | 0.312788 | *** |
| LAG3 | 0.059521 | 0.226302 | 0.051196 | 0.320204 |
| PDCD1 | 0.122171 | * | 0.123658 | * |

Cor, R value of Spearman’s correlation; None, correlation without adjustment. Purity, correlation adjusted by purity. *P < 0.05; **P < 0.005; ***P < 0.0005.

Table S6: Abbreviations and their meanings in the paper

| TCGA | The Cancer Genome Atlas |
| --- | --- |
| TGFBR1 | Transforming Growth Factor Beta Receptor 1 |
| STAD | Stomach Adenocarcinoma |
| GO | Gene ontology |
| KEGG | Kyoto Encyclopedia of Genes and Genomes |
| DEGs | Differential Expression Genes |
| GEPIA | Gene Expression Profiling Interactive Analysis |
| HR | Hazard Ratio |
| CI | Confidence Interval |
| ROC | Receiver Operating Characteristic |
| GSEA | Gene Set Enrichment Analysis |
| ssGSEA | Single-Sample Gene Set Enrichment Analysis |
| AUC | the Area Under Curve |
| LNM | Lymph Node Metastases |
| TME | Tumor Microenvironment |
| OS | Overall Survival |
| PFS | Progression-Free Survival |
| PPS | Post Progression Survival |
| TTP | Time to Progress |
| FP | Free Progression |
| CR | Complete Response |
| PR | Partial Response |
| SD | Stable Disease |
| PD | Progressive Disease |
| LASSO | The Least Absolute Shrinkage and Selection Operator |
| DIXDC1 | DIX domain containing 1 |
| FERMT2 | FERM domain containing kindlin 2 |
| BHMT2 | betaine--homocysteine S-methyltransferase 2 |
| ABCC9 | ATP binding cassette subfamily C member 9 |
| MSRB3 | methionine sulfoxide reductase B3 |
| SYNC | syncoilin, intermediate filament protein |
| SORBS1 | sorbin and SH3 domain containing 1 |
| DAPC | dystrophin associated protein complex |
| DLBC | Lymphoid Neoplasm Diffuse Large B-cell Lymphoma |
| ACC | Adrenocortical carcinoma |
| BRCA | Breast invasive carcinoma |
| BLCA | Bladder Urothelial Carcinoma |
| CHOL | Cholangiocarcinoma |
| COAD | Colon adenocarcinoma |
| GBM | Glioblastoma multiforme |
| HNSC | Head and Neck squamous cell carcinoma |
| LIHC | Liver hepatocellular carcinoma |
| PCPG | Pheochromocytoma and Paraganglioma |
| THCA | Thyroid carcinoma |
| LUAD | Lung adenocarcinoma |
| LUSC | Lung squamous cell carcinoma |
| KIRC | Kidney renal clear cell carcinoma |
| KIRP | Kidney renal papillary cell carcinoma |
| PRAD | Prostate adenocarcinoma |
| UCEC | Uterine Corpus Endometrial Carcinoma |
| LGG | Brain Lower Grade Glioma |
| ESCA | Esophageal carcinoma |
| CESC | Cervical squamous cell carcinoma and endocervical adenocarcinoma |
| MESO | Mesothelioma |
| OV | Ovarian serous cystadenocarcinoma |
| READ | Rectum adenocarcinoma |
| SARC | Sarcoma |
| SKCM | Skin Cutaneous Melanoma |
| LAML | Acute Myeloid Leukemia |
| COADREAD | Colon adenocarcinoma/Rectum adenocarcinoma Esophageal carcinoma |
| PAAD | Pancreatic adenocarcinoma |
| TGCT | Testicular Germ Cell Tumors |
| THYM | Thymoma |
| UVM | Uveal Melanoma |
| TAM | Tumor-Associated Macrophages |
| NK cell | Natural Killer cell |
| Tfh | T Follicular Helper |
| Th | Helper T cell |
| Tregs | Regulatory cells |

**FigS1**

**
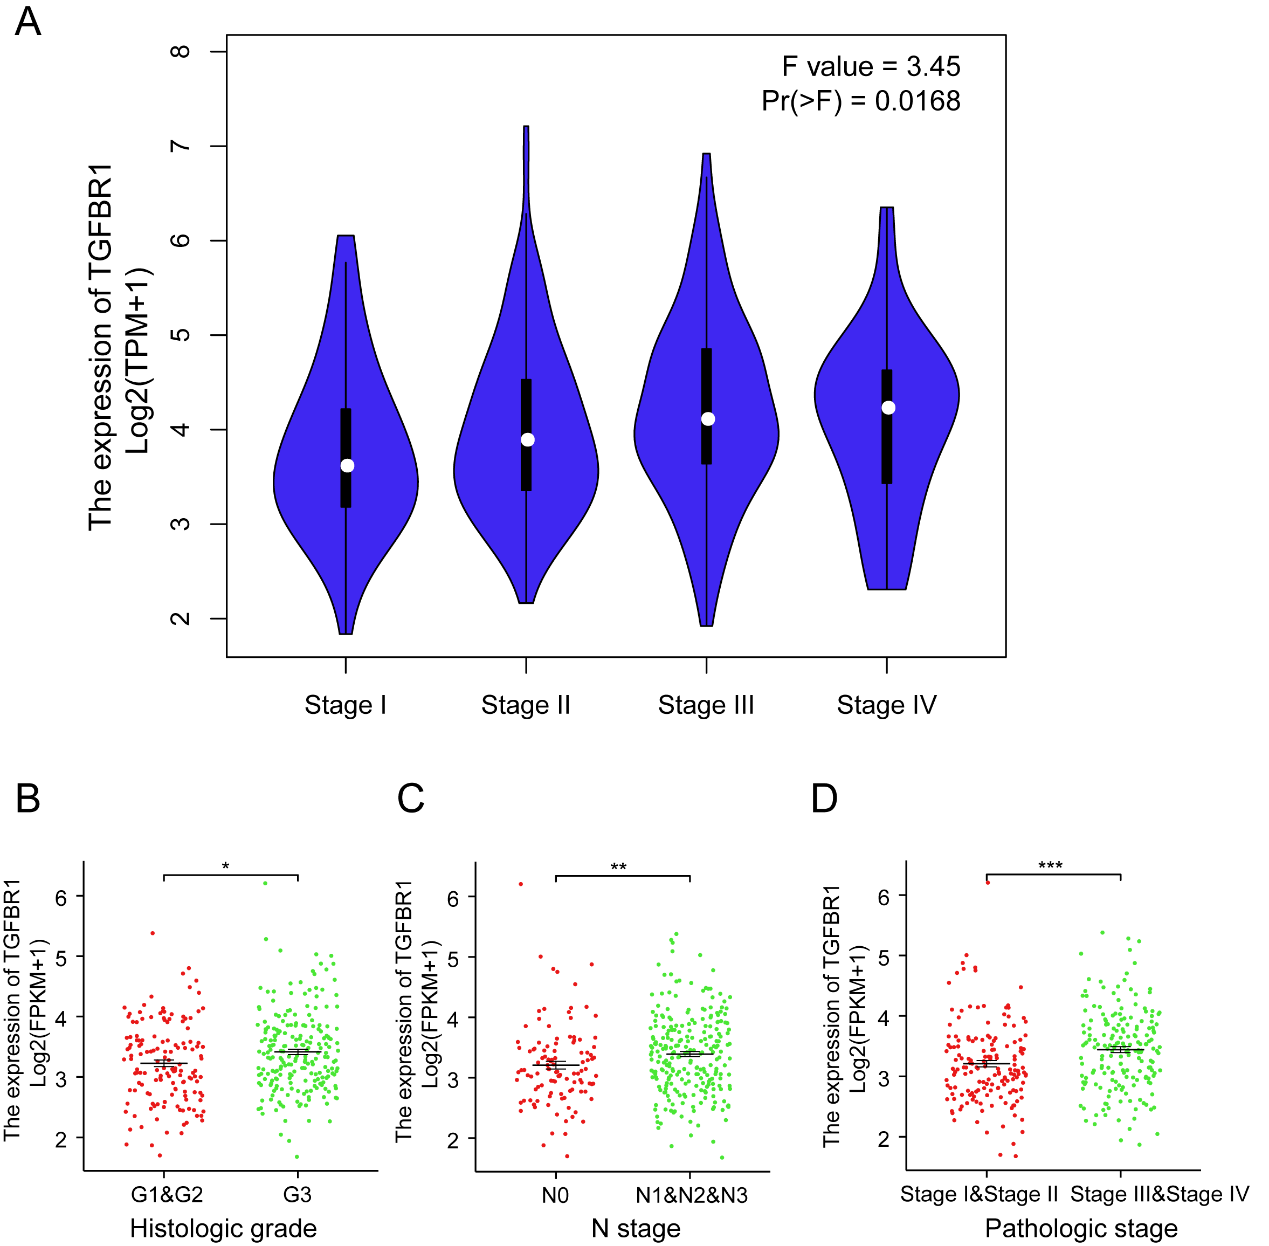
**

**Fig S1:** High TGFBR1 Expression is Correlated with Clinicopathologic Features in Patients with STAD. A. Correlations between TGFBR1 expression and tumor stage in STAD patients (GEPIA2). B. The level of TGFBR1 in 375 different degree histologic grades of STAD. C. The level of TGFBR1 between LNM and non-LNM in 375 STAD patients. D. The level of TGFBR1 in different degree pathologic stage of 375 STAD patients.

**FigS2**

**
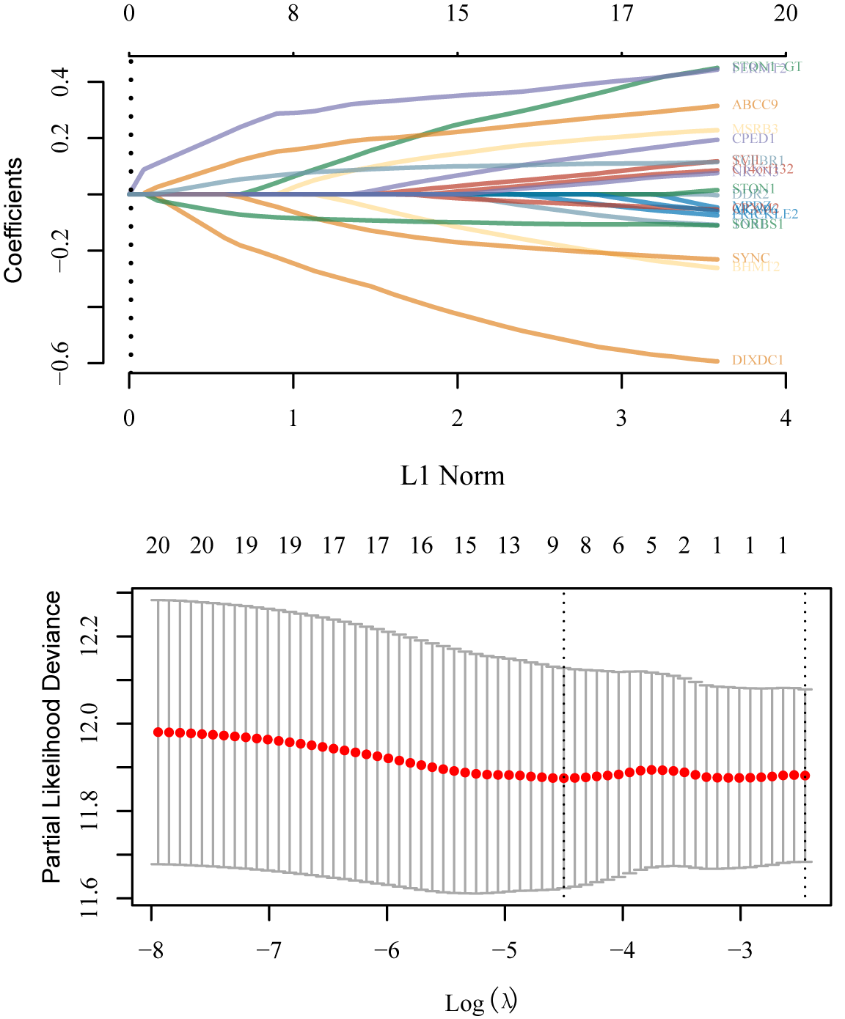
**

FigS2. LASSO regression analysis of the 20 DEGs and TGFBR1.

**Fig S3**


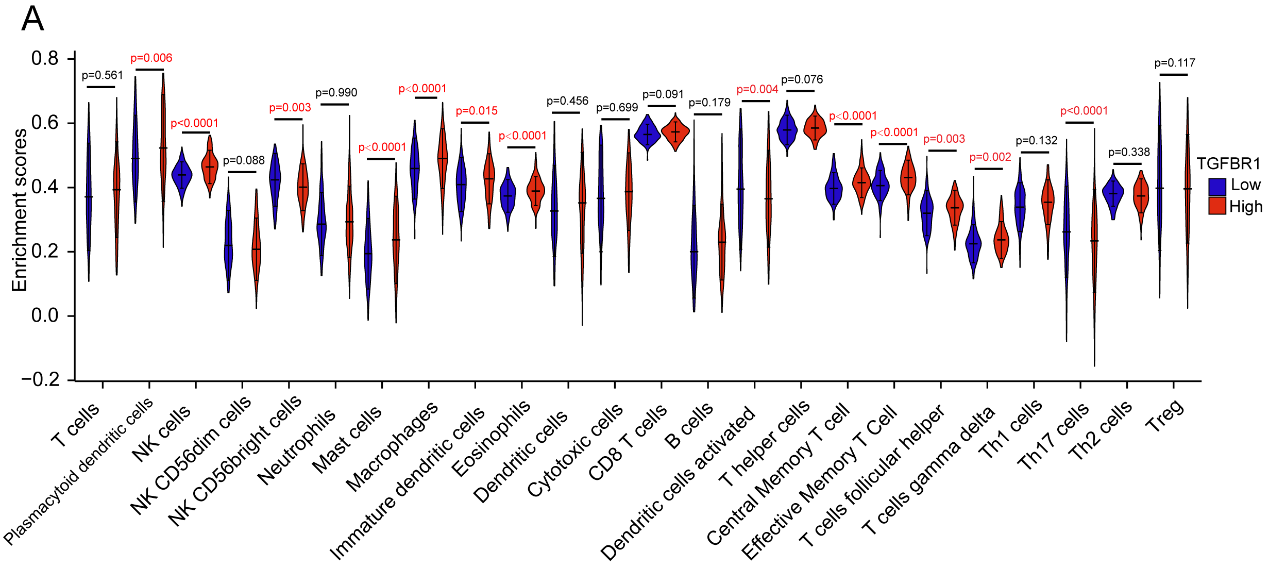


**Fig S3:** A. the enrichment scores of TGFBR1 expression in 24 immune cells.

**Fig S4**

**
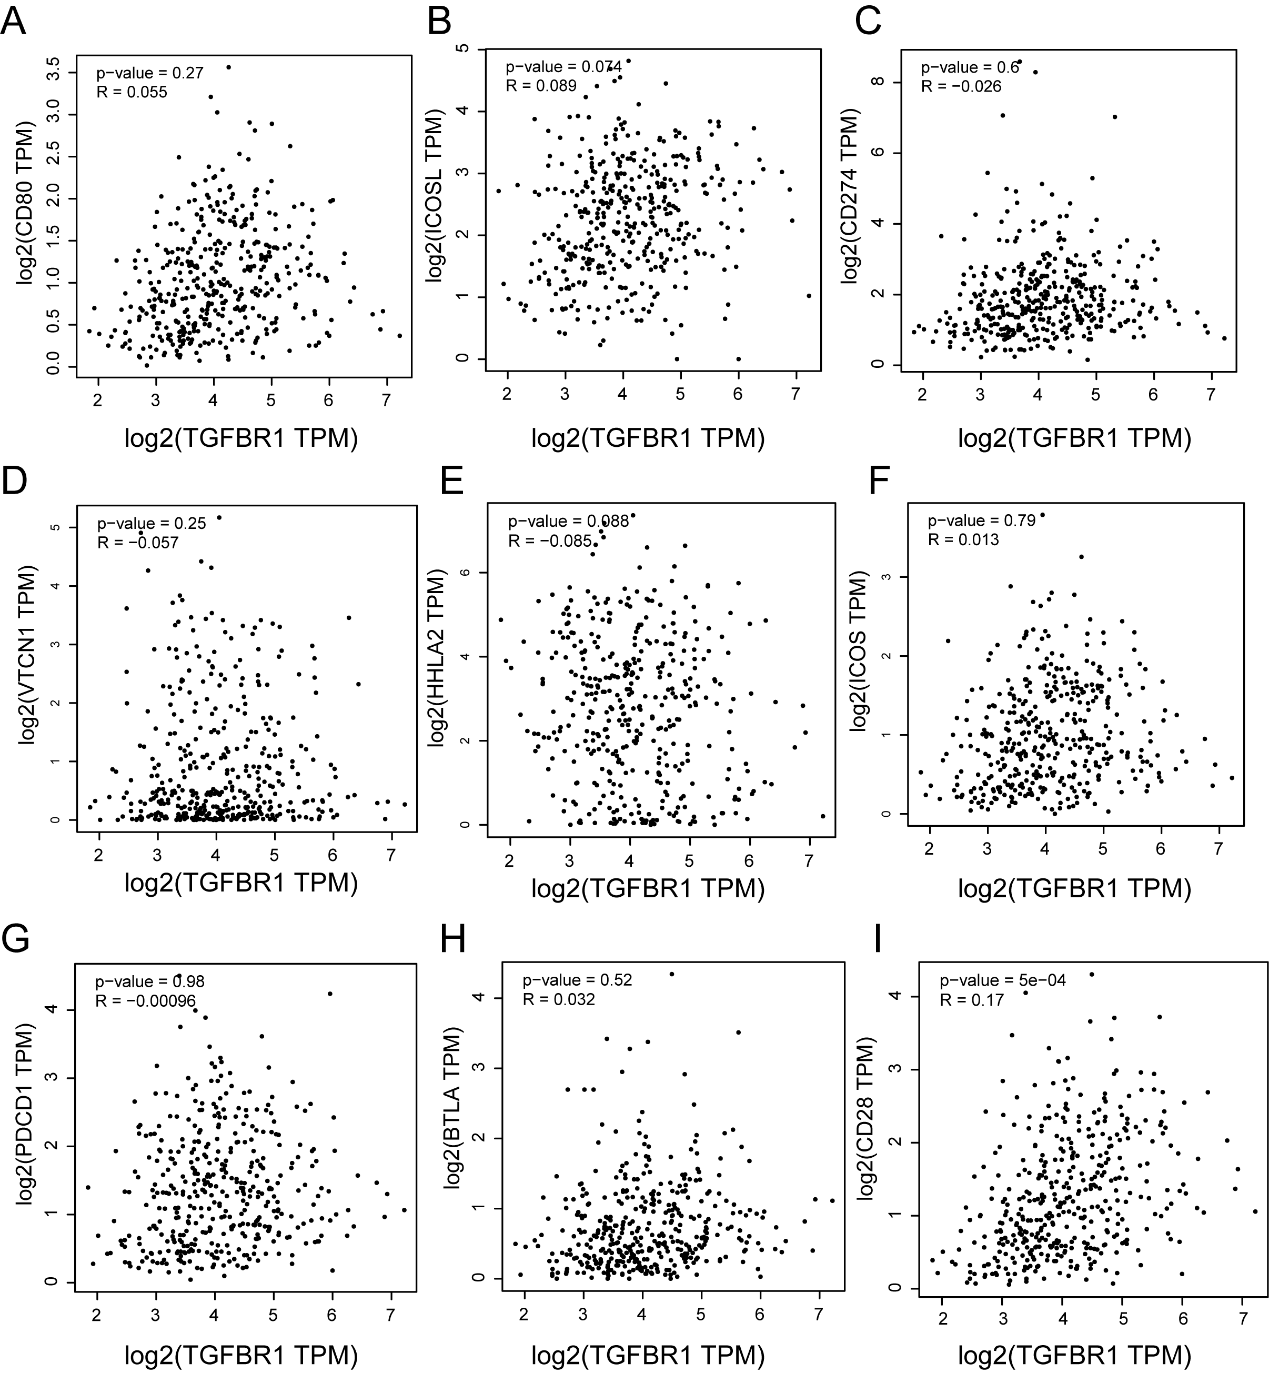
**

**Fig S4:** A-I. Correlation analysis between TGFBR1 expression and immune checkpoint in STAD based on GEPIA2.
